# Supplementary material
Source: Springer Nature journal article supplement (https://www.springermedizin.de/resource/supplementary/12978_2013_245_MOESM5_ESM.pdf/9602310)
Supplement: MOESM5 [file 9602310]

| Types of physical violence                                  | Frequency | Percent |
|-------------------------------------------------------------|-----------|---------|
| pushed, shoved, shake or throw something to her             | 375       | 55.0%   |
| punched, hit with fist, twist their arm that could hurt her | 320       | 46.9%   |
| slapped, kicked, dragged or beaten                          | 202       | 29.6%   |
| attacked her with knife, gun, or other type of weapon       | 38        | 5.6%    |
| ever scalded or burnt purposefully                          | 31        | 4.5%    |
| *Multiple responses were possible                           |           |         |
